# Supplementary material for: Internal Representations of Temporal Statistics and Feedback Calibrate Motor-Sensory Interval Timing
Source: PubMed Central journal article supplement (PMC3510049; doi:10.1371/journal.pcbi.1002771), 2012-11-29
Supplement: pcbi.1002771.s001.pdf [file pcbi.1002771.s001.pdf]

| Subject             | Sensory likelihood |         | Motor likelihood |         | Subjective prior |         | Loss function |         |
|---------------------|--------------------|---------|------------------|---------|------------------|---------|---------------|---------|
| <b>Experiment 1</b> |                    |         |                  |         |                  |         |               |         |
| LA                  | Sc                 | (1.000) | Sc               | (1.000) | b                | (1.000) | Sk            | (1.000) |
| JW                  | Sc                 | (0.967) | Sc               | (1.000) | b                | (0.960) | St            | (1.000) |
| TL                  | Cn                 | (1.000) | Sc               | (1.000) | b                | (1.000) | Sk            | (1.000) |
| DB                  | Sc                 | (1.000) | Sc               | (0.974) | e                | (0.997) | St            | (1.000) |
| <b>Experiment 2</b> |                    |         |                  |         |                  |         |               |         |
| LA                  | Sc                 | (1.000) | Sc               | (0.997) | g                | (1.000) | Sk            | (1.000) |
| AC                  | Cn                 | (1.000) | Sc               | (1.000) | f                | (0.978) | St            | (1.000) |
| AP                  | Cn                 | (1.000) | Sc               | (0.981) | b                | (1.000) | Sk            | (1.000) |
| HH                  | Sc                 | (0.997) | Sc               | (0.997) | g                | (0.998) | Sk            | (0.875) |
| JB                  | Sc                 | (0.998) | Cn               | (0.996) | f                | (0.997) | Sk            | (1.000) |
| TZ                  | Sc                 | (1.000) | Cn               | (1.000) | d                | (0.976) | Sk            | (1.000) |
| <b>Experiment 3</b> |                    |         |                  |         |                  |         |               |         |
| LA                  | Cn                 | (0.910) | Sc               | (0.990) | b                | (1.000) | St            | (0.993) |
| NY                  | Sc                 | (0.988) | Sc               | (0.780) | b                | (1.000) | Fr            | (1.000) |
| JL                  | Sc                 | (0.528) | Sc               | (1.000) | b                | (0.999) | St            | (1.000) |
| RD                  | Cn                 | (1.000) | Sc               | (0.996) | b                | (0.998) | Fr            | (1.000) |
| PD                  | Sc                 | (0.758) | Cn               | (1.000) | b                | (0.999) | St            | (1.000) |
| JE                  | Cn                 | (0.896) | Sc               | (0.912) | b                | (1.000) | St            | (1.000) |
| <b>Experiment 4</b> |                    |         |                  |         |                  |         |               |         |
| RR                  | Cn                 | (0.986) | Sc               | (0.950) | a                | (0.998) | St            | (-)     |
| DD                  | Cn                 | (0.726) | Cn               | (0.641) | f                | (0.511) | St            | (-)     |
|                     |                    |         |                  |         | g                | (0.486) |               |         |
| NG                  | Cn                 | (0.980) | Sc               | (0.973) | b                | (0.503) | St            | (-)     |
|                     |                    |         |                  |         | g                | (0.458) |               |         |

**Table S1. Bayesian model comparison: most supported observer model components for Experiments 1–4.** Most supported observer model components (posterior probability), for each subject, according to the Bayesian model comparison. A posterior probability  $p > 0.95$  should be considered suggestive evidence, and  $p > 0.99$  significant (posterior probability  $p > 0.9995$  is written as 1.000, with a slight abuse of notation). The sensory and motor likelihoods can either be constant (Cn) or scalar (Sc); the subjective priors (a-g) are described in the Methods section (see main text); the loss function can be Skewed (Sk), Standard (St) or Fractional (Fr) (see also Figure 6 in main text). Note the switch in preferred loss function from Experiments 1 and 2 (which received Skewed feedback) to Experiment 3 (which received Standard feedback). In Experiment 4 the loss function was fixed to Standard to constrain the model selection.
