# Supplementary material for: Internal Representations of Temporal Statistics and Feedback Calibrate Motor-Sensory Interval Timing
Source: PubMed Central journal article supplement (PMC3510049; doi:10.1371/journal.pcbi.1002771), 2012-11-29
Supplement: pcbi.1002771.s003.pdf [file pcbi.1002771.s003.pdf]

# Internal Representations of Temporal Statistics and Feedback Calibrate Motor-Sensory Interval Timing

L. Acerbi, D. M. Wolpert and S. Vijayakumar

## Supporting Text S2 – Results of Experiments 3 and 4

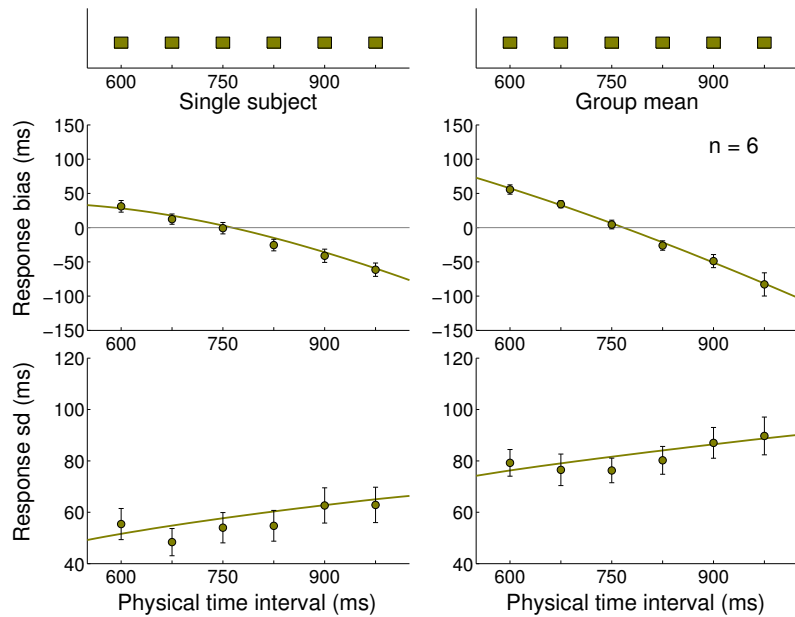

**Figure S5. Experiment 3: Medium Uniform block with Standard feedback.** *Very top:* Experimental distribution for Medium Uniform block, repeated on top of both columns. *Left column:* Mean response bias (average difference between the response and true interval duration, top) and standard deviation of the response (bottom) for a representative subject. Error bars denote s.e.m. Continuous lines represent the Bayesian model 'fit' obtained averaging the predictions of the most supported models (Bayesian model averaging). *Right column:* Mean response bias (top) and standard deviation of the response (bottom) across subjects (mean  $\pm$  s.e.m. across subjects). Continuous lines represent the Bayesian model 'fit' obtained averaging the predictions of the most supported models across subjects.

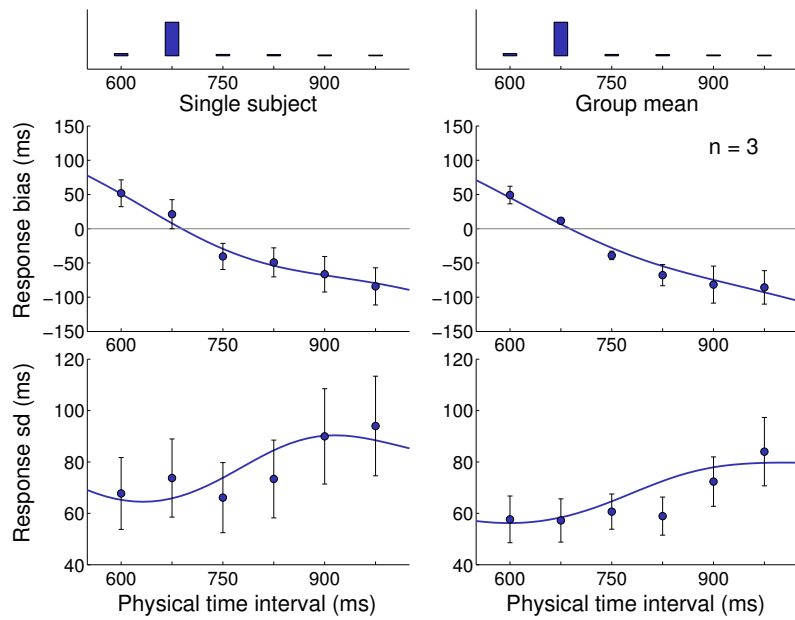

**Figure S6. Experiment 4: Medium High-Peaked block.** *Very top:* Experimental distribution for Medium High-Peaked block, repeated on top of both columns. *Left column:* Mean response bias (average difference between the response and true interval duration, top) and standard deviation of the response (bottom) for a representative subject. Error bars denote s.e.m. Continuous lines represent the Bayesian model ‘fit’ obtained averaging the predictions of the most supported models (Bayesian model averaging). *Right column:* Mean response bias (top) and standard deviation of the response (bottom) across subjects (mean  $\pm$  s.e.m. across subjects). Continuous lines represent the Bayesian model ‘fit’ obtained averaging the predictions of the most supported models across subjects.
